# Supplementary material for: Glucose starvation-mediated inhibition of salinomycin induced autophagy amplifies cancer cell specific cell death
Source: PubMed Central journal article supplement (PMC4496345; doi:10.18632/oncotarget.3548), 2015-03-12
Supplement: oncotarget-06-10134-s001.pdf [file oncotarget-06-10134-s001.pdf]

## Glucose starvation-mediated inhibition of salinomycin induced autophagy amplifies cancer cell specific cell death

### Supplementary Material

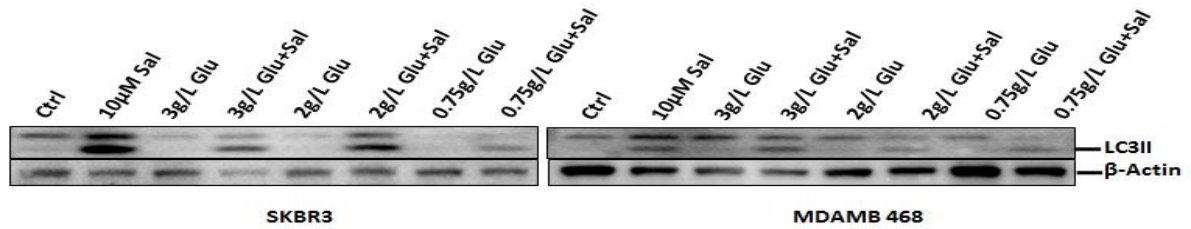

**Supplementary Figure 1: Inhibition of Salinomycin-induced autophagy by starvation is cancer cell type independent:** In a similar experimental settings as for experiments shown in figure 4, where PC3 cells were tested, we further checked the LC3II-form quantity upon Salinomycin treatment, combined with glucose- and FBS-starvation, in breast cancer cells SKBR3 and MDAMB468. The data obtained in these cell line models confirmed results obtained in PC3 cells.
